# Supplementary material for: Tb3+-doped LaF3nanocrystals for correlative cathodoluminescence electron microscopy imaging with nanometric resolution in focused ion beam-sectioned biological samples
Source: Royal Society of Chemistry journal article supplement (doi:10.1039/c6nr09187c), 2017-01-01
Supplement: c6nr09187c1.pdf [file c6nr09187c1.pdf]

## ELECTRONIC SUPPLEMENTARY INFORMATION

### **Tb<sup>3+</sup>-doped LaF<sub>3</sub> nanocrystals for correlative cathodoluminescence electron microscopy imaging with nanometric resolution in focus ion beam-sectioned biological samples**

Kerda Keevend,<sup>1</sup> Michael Stiefel,<sup>2</sup> Anna Lena Neuer,<sup>1</sup> Martin T. Matter,<sup>1</sup> Antonia Neels,<sup>3</sup>  
Sergio Bertazzo,<sup>4</sup> Inge K. Herrmann<sup>1\*</sup>

[\\*inge.herrmann@empa.ch](mailto:inge.herrmann@empa.ch)

+41 (0)58 765 71 53

[s.bertazzo@ucl.ac.uk](mailto:s.bertazzo@ucl.ac.uk)

<sup>1</sup>*Particles-Biology Interactions, Department of Materials Meet Life, Swiss Federal Laboratories for Materials Science and Technology (Empa), Lerchenfeldstrasse 5, 9014 St. Gallen, Switzerland*

<sup>2</sup>*Reliability Science and Technology, Department of Materials Meet Life, Swiss Federal Laboratories for Materials Science and Technology (Empa), Uberlandstrasse 129, 8600 Dubendorf, Switzerland*

<sup>3</sup>*Center for X-ray Analytics, Department of Materials Meet Life, Swiss Federal Laboratories for Materials Science and Technology (Empa), Uberlandstrasse 129, 8600 Dubendorf, Switzerland*

<sup>4</sup>*Department of Medical Physics and Biomedical Engineering, University College London (UCL), Malet Place Engineering Building, London, WC1E 6BT, United Kingdom*

## **MATERIALS AND METHODS**

### **Reagents**

Lanthanum (III) nitrate hexahydrate ( $\text{La}(\text{NO}_3)_3 \cdot 6\text{H}_2\text{O}$ , 99.999%), terbium (III) nitrate pentahydrate ( $\text{Tb}(\text{NO}_3)_3 \cdot 5\text{H}_2\text{O}$ , 99.9%), ammonium fluoride ( $\text{NH}_4\text{F}$ ,  $\geq 99.99\%$ ), ethylene glycol ( $\text{HOCH}_2\text{CH}_2\text{OH}$ ,  $\geq 99.5\%$ ) and polyvinylpyrrolidone (PVP, MW  $\sim 55,000$ ) were purchased from Sigma-Aldrich. Poly(ethylene glycol) methyl ether thiol (mPEG-SH, MW 1k) was purchased from Creative PEGWorks. All the reagents were used without further purification. Cell culture media and supplements were purchased from Life Technologies. Used water was double distilled ( $\text{ddH}_2\text{O}$ ).

### **Synthesis of $\text{LaF}_3:\text{Tb}^{3+}$ - PVP/ -PEG nanocrystals**

$\text{LaF}_3:\text{Tb}^{3+}$  nanocrystals capped with polymer were synthesized in ethylene glycol via coprecipitation. The dopant concentration was kept around 10%. Typically, 30 ml of 0.10M  $\text{La}(\text{NO}_3)_3$ , 10 ml of 0.03M  $\text{Tb}(\text{NO}_3)_3$  and 0.2 grams of polymer (either PEG or PVP) were mixed under continuous stirring. Then 10 ml of 0.32M  $\text{NH}_4\text{F}$  solution was added to the mixture of RE ions. The reaction was carried out at 150 °C for 3h under stirring. Synthesized nanocrystals were collected by centrifugation and washed several times with ethanol and  $\text{ddH}_2\text{O}$ . Finally, particles were stored in  $\text{ddH}_2\text{O}$  for further use.

### **Physicochemical characterization**

Particles were prepared for TEM by sonicating the initial colloid for 10 minutes in ultrasonication bath. Then, 10  $\mu\text{l}$  of colloid was diluted with  $\text{ddH}_2\text{O}$ . The TEM grids (200 mesh Cu grids with formvar film (Electron Microscopy Science, Lucerna-Chem AG, Lucerne, Switzerland)) were placed on the droplet and soaked for 5 minutes. The grid was air-dried. After drying, the grid was imaged in a JEOL 2000FX transmission electron microscope.

Fluorescence spectroscopy was performed using a Quantaaurus-QY C11347-11, Hamamatsu Spectrometer, using an excitation wavelength of 346 nm.

XRD was done on white powders of as-prepared terbium-doped  $\text{LaF}_3$  nanocrystals which were mounted on a Stoe Mark II-Imaging Plate Diffractometer System (Stoe & Cie, 2015) equipped with a graphite-monochromator. Data collection was performed at  $-100^\circ\text{C}$  using Mo- $\text{K}\alpha$  radiation ( $\lambda = 0.71073 \text{ \AA}$ , beam diameter 0.5 mm). Two-dimensional diffraction

images (30 min per exposure) were obtained at an image plate distance of 200 mm with a continued sample rotation. The resolution was  $D_{\min} - D_{\max}$  24.00 - 0.82 Å and intensity integration has been performed over the entire image (360°). Crystallite size was calculated using the Scherrer equation

$$D = \frac{0.94\lambda}{\beta \cos\theta}$$

where D is the diameter of the particle,  $\lambda$  is the wavelength of the X-ray and  $\beta$  is the full width at half maximum (FWHM) corrected for instrument broadening.

Thermogravimetric analysis (TGA) of powdered samples was performed in air using a NETZSCH TG 209 F1 instrument, heating from 25-500 °C at 10 K·min<sup>-1</sup>.

Fourier-transformed infrared spectroscopy (FTIR) was performed on a Bruker Tensor 27 FT-IR spectrometer for powdered samples.

Hydrodynamic size and concentration measurements were performed using a Nano Sight NS 500 (Malvern) nanoparticle tracking analysis (NTA) instrument. Suspended particles were illuminated with a 532 nm laser beam and the hydrodynamic size was calculated based on the Stokes-Einstein equation. Before the measurement, the NS500 instrument was primed following the user manual. Particles were diluted 1:100 in cell culture media (RPMI-1640, Life Technologies) and vortexed before the measurements. Particle suspensions were analysed using measurement conditions of 30-100 particles/frame and 5 consecutive runs of 200 seconds each were recorded.

### **Cytotoxicity measurements**

Cytotoxicity measurements were carried out according to the protocol from the manufacturer using Promega CytoTox 96® Non-Radioactive Cytotoxicity Assay kit.

### **Preparation of cellular specimens for CL-FIB-SEM imaging and imaging conditions**

Human lung cells (A549) were cultured in Roswell Park Memorial Institute Media (RPMI-1640) containing 10% fetal bovine serum (FBS) at 37°C in 5% CO<sub>2</sub>. Cells were sub-cultured every fifth day and grown to 75% confluence. For experiments, cells were seeded at a density of 60 000 cells/cm<sup>2</sup> in cell culture media containing 10% FBS and left to attach for 24 hours. Next, cells were incubated with LaF<sub>3</sub> nanocrystals (100 µg for 100 000 cells) for 24 hours.

Cells were then gently washed with pre-warmed PBS, trypsinized and fixed with 4% methanol-free paraformaldehyde (PFA) overnight in the fridge. Pellets were then washed with ddH<sub>2</sub>O (3x) and cacodylate buffer (0.1M) (3x) and stained with 2% osmium tetroxide and 1.5% potassium ferricyanide for 1 hour. Pellets were washed with ddH<sub>2</sub>O and then gradually dehydrated using an ethanol gradient (20%, 40%, 50%, 60 %, 70%, 80%, 90%, 95%, 100% (3x)) and embedded in epoxy resin (EPON 812), according to procedures described in the manufacturer's protocol. Resin blocks were cured in the oven for 48 hours, trimmed with a razor blade and then sectioned in 100 nm sections using an ultramicrotome, where applicable. The thin sections were imaged in a FEI Helios 660 G3 UC FIB/SEM system using a 30 kV electron beam in the transmission mode. Resin-blocks were sputter-coated with gold/platinum and trenches of 50  $\mu$ m width and several tens of micrometers in depth were cut using a focused gallium ion beam. The focused ion beam was operated at 30 kV and beam currents between 47 nA to 9 nA have been used to cut and polish the cross-sections. Cross-sections were then imaged using an in-lens backscattering and secondary electron detector. Cathodoluminescence images were acquired using a Delmic SPARC detection system. The detector was operated either in spectroscopic mode or in imaging mode, therefore either an Andor Shamrock 193 spectrograph or a PMT were used respectively to image the sample. Cathodoluminescence images are slightly distorted due to a sample shift related to sample charging and discharging during data acquisition and therefore for overlay images, the angles have been changed.

## SUPPLEMENTARY FIGURES

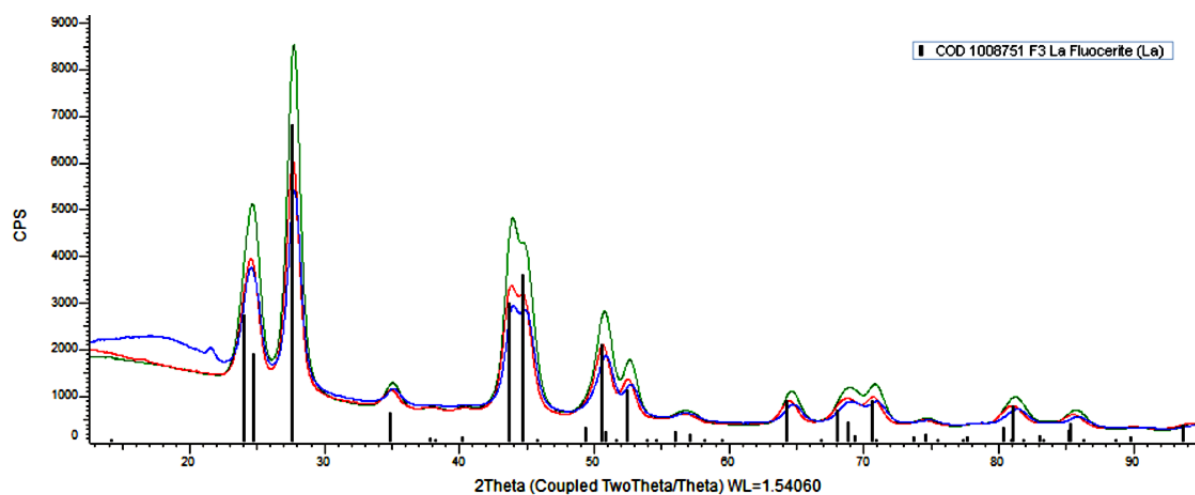

**Figure S1.** Reference data of hexagonal  $\text{LaF}_3$ .

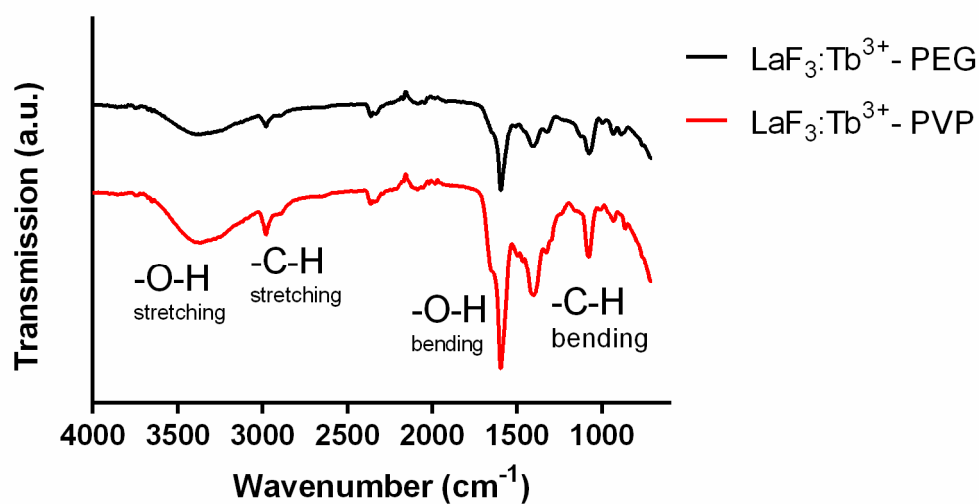

**Figure S2.** Fourier-transformed infrared spectroscopy (FTIR) spectra for polymer coated as-prepared  $\text{LaF}_3:\text{Tb}^{3+}$  nanocrystals.

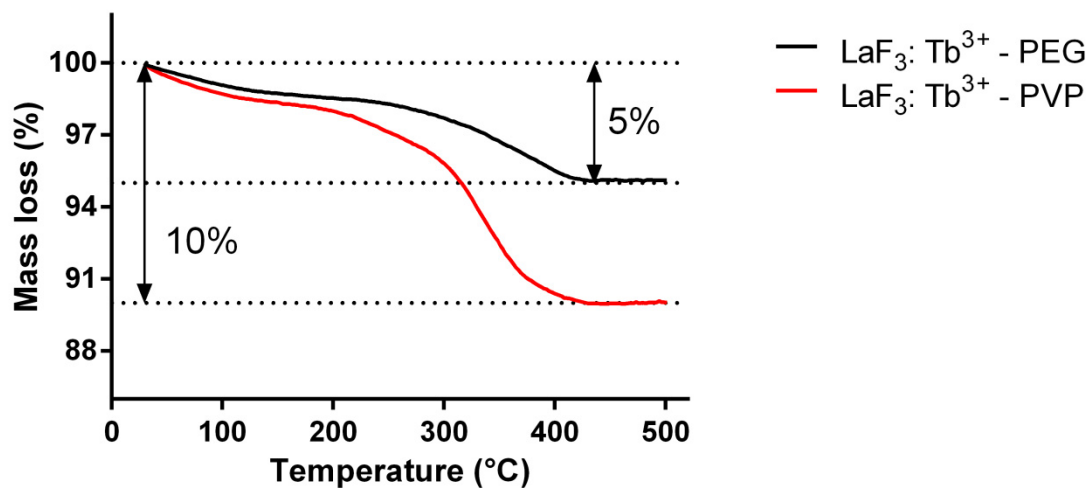

**Figure S3.** Thermogravimetric analysis of polymer coated as-prepared LaF<sub>3</sub>:Tb<sup>3+</sup> nanocrystals.

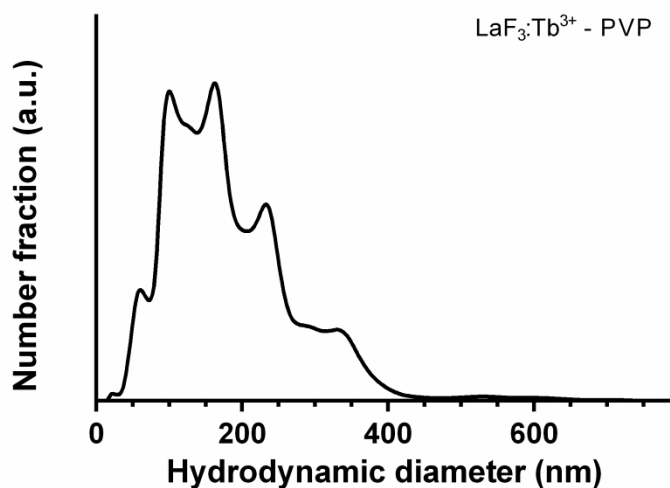

**Figure S4.** Nanoparticle tracking analysis (NTA) measurements for PVP covered LaF<sub>3</sub>:Tb<sup>3+</sup> nanocrystals.

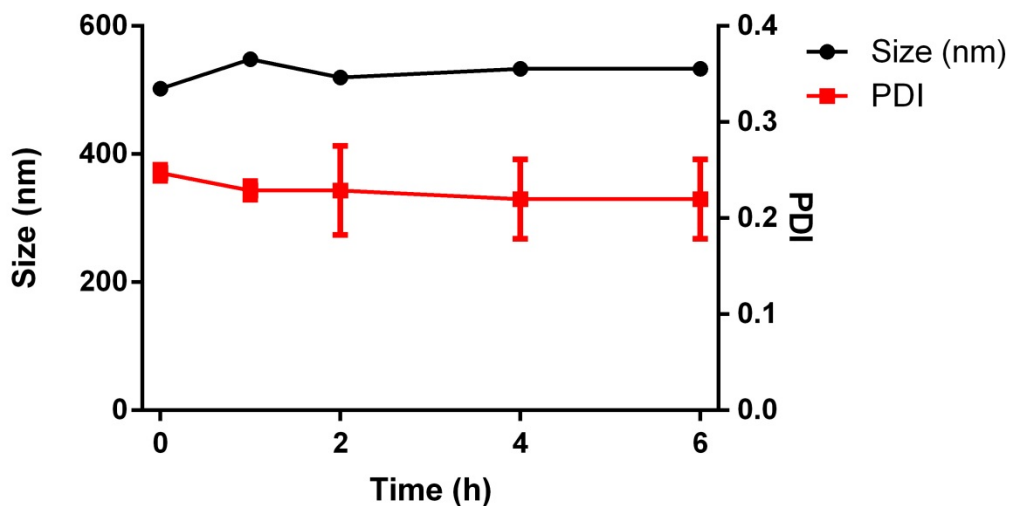

**Figure S5.** Colloidal stability of PEGylated  $\text{LaF}_3:\text{Tb}^{3+}$  nanocrystals in protein containing media over time.

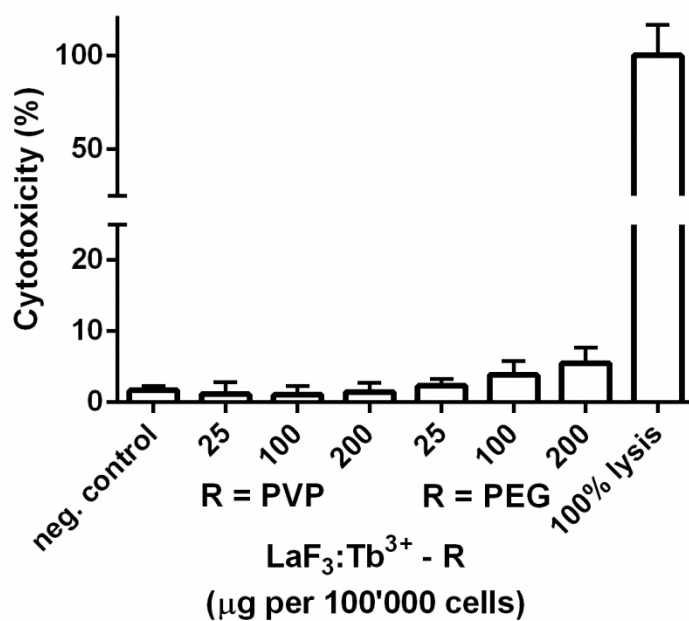

**Figure S6.** LDH activity measurements in cell culture supernatants after 24 hours of polymer-coated  $\text{LaF}_3:\text{Tb}^{3+}$  nanoparticles to human lung cells (A549).

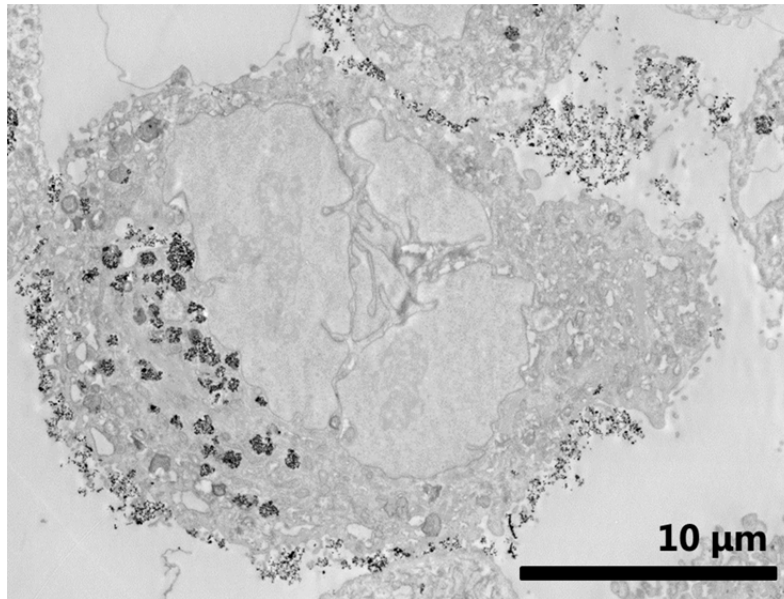

**Figure S7.** Scanning transmission electron (STEM) micrograph of 100 nm sections of A549 cells showing particles localized in endosomes and in proximity of the outer cell membrane.

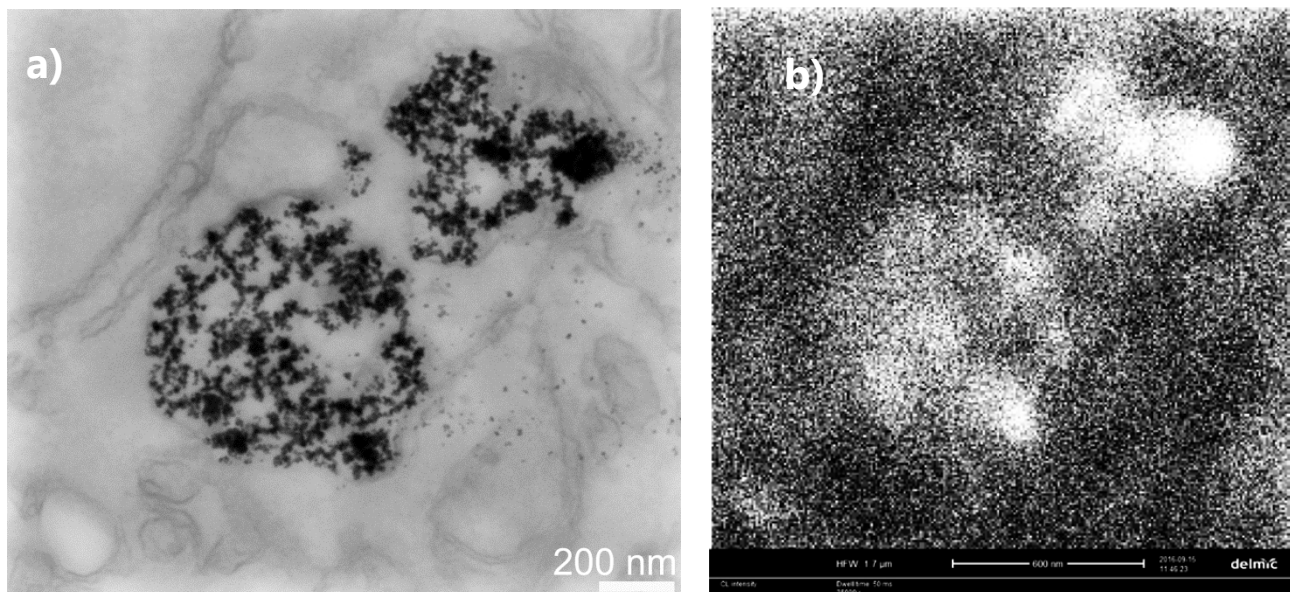

**Figure S8.** Scanning transmission electron micrograph of 100 nm sections of A549 cells (a) and corresponding original cathodoluminescence image of the area with pixel sizes of 2 nm (b).



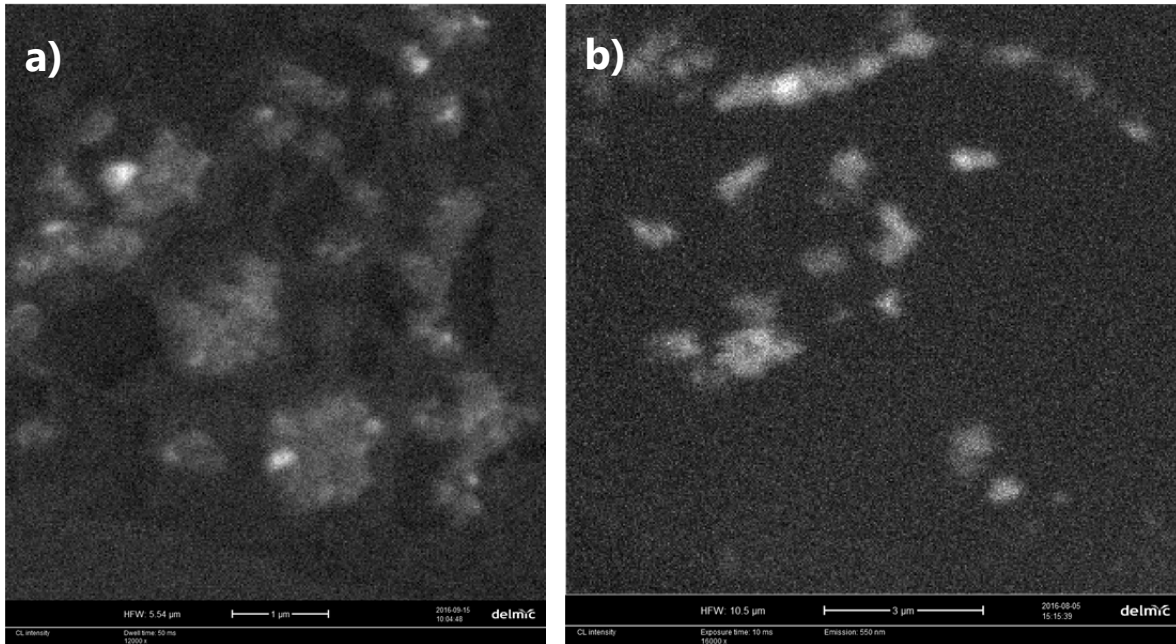

**Figure S9.** Original cathodoluminescence images of luminescent particles in 100 nm sections of A549 cells **(a)** and cells exposed in a FIB cut **(b)**.

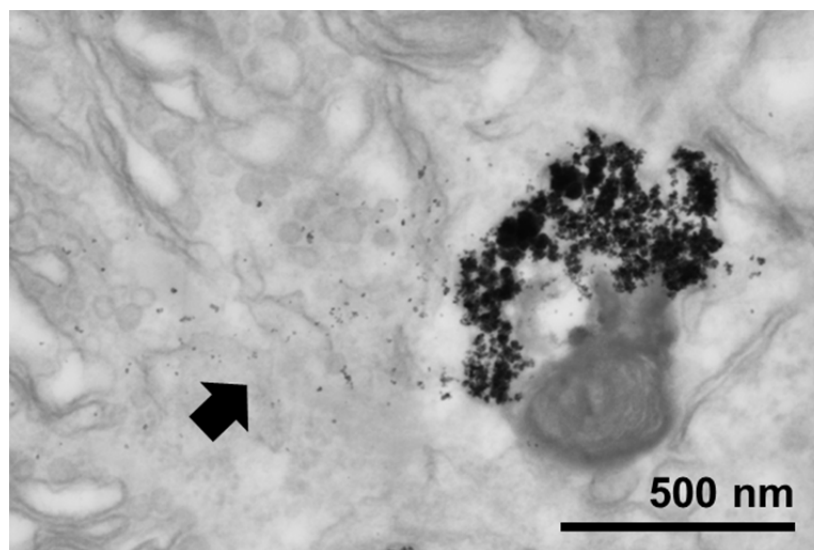

**Figure S10.** STEM images reveal mechanical artefact caused by the sectioning in the ultra-microtome, the arrow indicates particles outside of vesicular bodies.

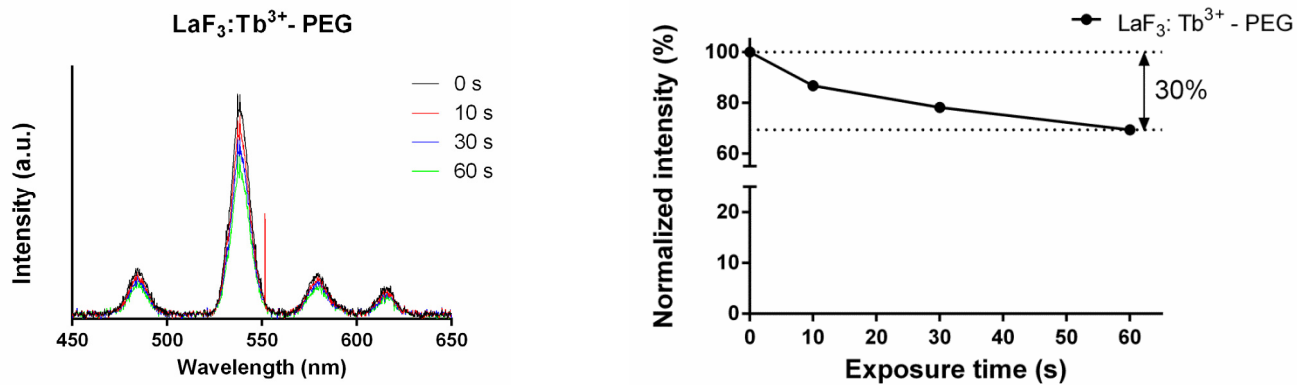

**Figure S11:** Cathodoluminescence intensity as a function of electron beam (5 kV) exposure time. These measurements have been performed using nanocrystals on TEM grids with a dwell time of 1  $\mu$ s.
